# Supplementary material
Source: PubMed Central journal article supplement (PMC3625341)
Supplement: 1216778110_pnas.201216778SI.pdf [file 1216778110_pnas.201216778SI.pdf]

# Supporting Information

Gowda et al. 10.1073/pnas.1216778110

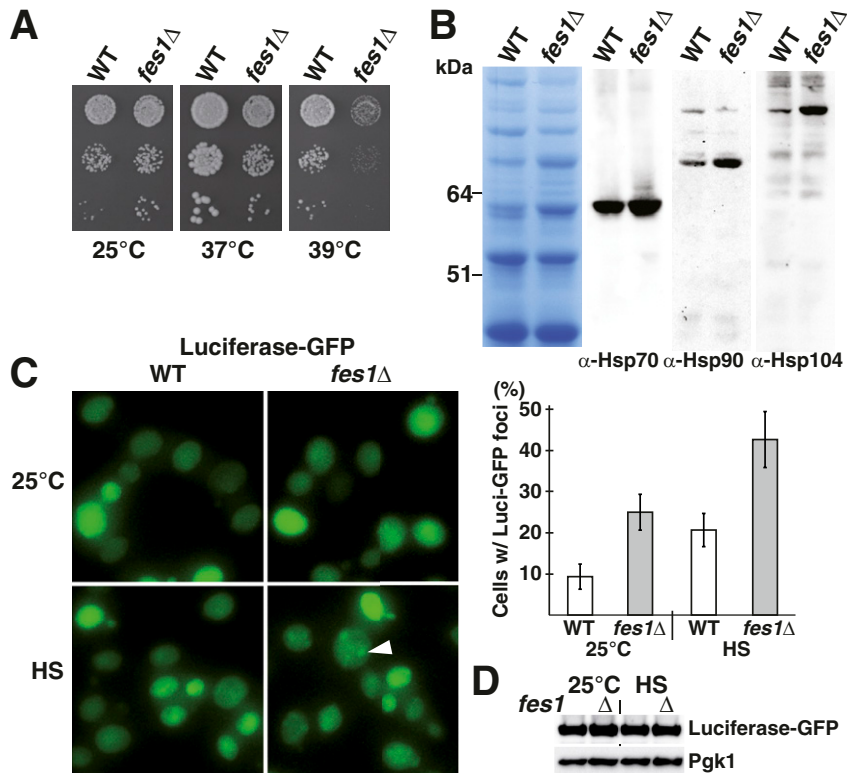

**Fig. S1.** *FES1* mutant cells are hypersensitive to conditions inducing protein misfolding conditions and accumulate protein aggregates. (A) *fes1* $\Delta$  strains are hypersensitive to elevated growth temperature. Tenfold dilutions of a series of cell suspensions were spotted onto YPD medium and were incubated at the indicated temperatures. (B) Total protein extracts from WT and *fes1* $\Delta$  cells grown in Yeast extract peptone dextrose (YPD) at 25 °C separated by SDS/PAGE and stained with Coomassie Brilliant Blue or analyzed by Western blotting with antibodies specific for Hsp70 (Ssa1/2 rabbit polyclonal serum), Hsp90 (monoclonal antibody K41220A), and Hsp104 (rabbit polyclonal serum). (C) Images of GFP fluorescence microscopy of fixed WT and *fes1* $\Delta$  cells expressing the aggregation reporter luciferase-GFP grown at 25 °C or heat shocked (HS) at 37 °C for 30 min. The arrow shows an aggregate. The aggregation data were quantified by counting the fraction of cells ( $n = 30$ ) that contained detectable GFP aggregates. The error bars indicate the SD of three datasets from independent biological replicates. (D) Western analysis of luciferase (Luci)-GFP expression levels in the same strains under identical growth conditions as in C.

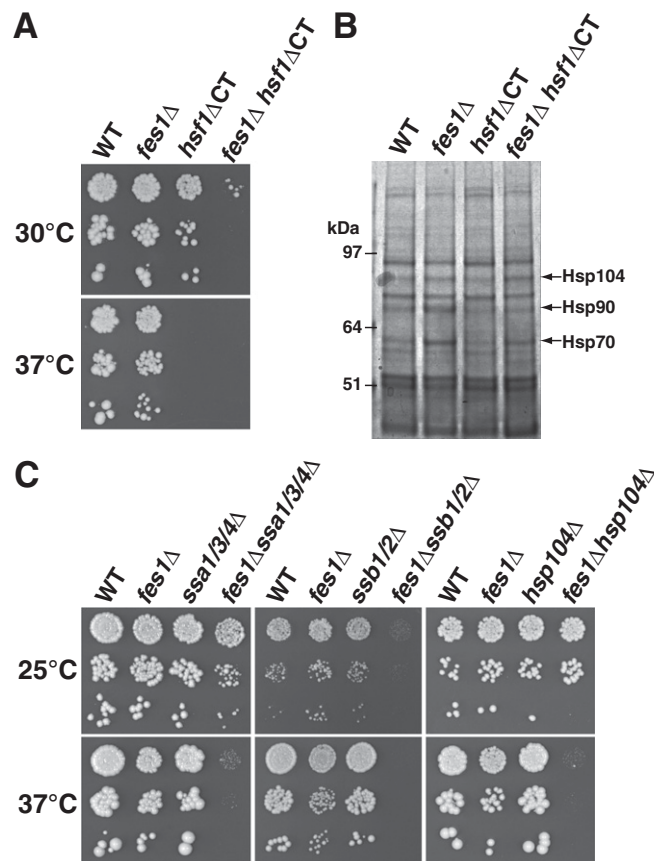

**Fig. S2.** Cells lacking *FES1* are hypersensitive to mutations that impair heat shock factor 1 (Hsf1) and chaperones Hsp70 and Hsp104. (A) Genetic interactions scored by growth phenotypes between *fes1*Δ and a mutation that impair Hsf1 activity from truncation of the C-terminal activation domain (*hsf1*ΔCT). (B) Heat shock induction (Hsp70, Hsp90, and Hsp104) in the indicated strains was assessed by SDS/PAGE. (C) Genetic interactions between *fes1*Δ and the genetic deletion of the three heat shock-inducible Hsp70s (*ssa1/3/4*Δ), of the ribosome-associated Hsp70s (*ssb1/2*Δ), or of the AAA+ ATPase and disaggregase Hsp104 (*hsp104*Δ).

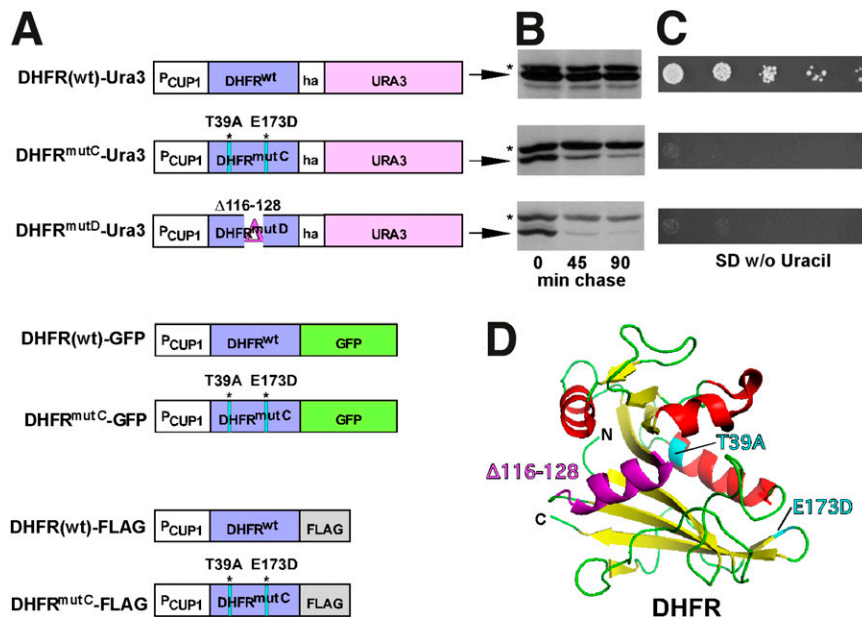

**Fig. S3.** Folding-deficient model substrates. (A) Shown are the DHFR constructs used in this study, all of which were expressed from the copper-inducible promoter (P<sub>CUP1</sub>) on centromeric plasmids and epitope tagged with human influenza hemagglutinin epitope (HA), the FLAG epitope (FLAG), or GFP. The Ura3 protein is the enzyme orotidine-5'-phosphate decarboxylase in uracil biosynthesis. (B) Cycloheximide chase assay of yeast cells expressing WT or the mutant DHFR-HA-Ura3 constructs. Proteins were detected by anti-HA Western blotting. A cross-reactive band is indicated by an asterisk. (C) Growth assay of yeast cells expressing the same constructs as in B on synthetic dextrose (SD) minimal media lacking uracil. (D) Illustration of the crystal structure of mouse Dihydrofolate reductase (DHFR). The  $\alpha$  helix (residues 116–128) deleted in DHFR<sup>mutD</sup> is highlighted in purple. The two residues (T39A, E173D) that are mutated in DHFR<sup>mutC</sup> are highlighted in magenta.

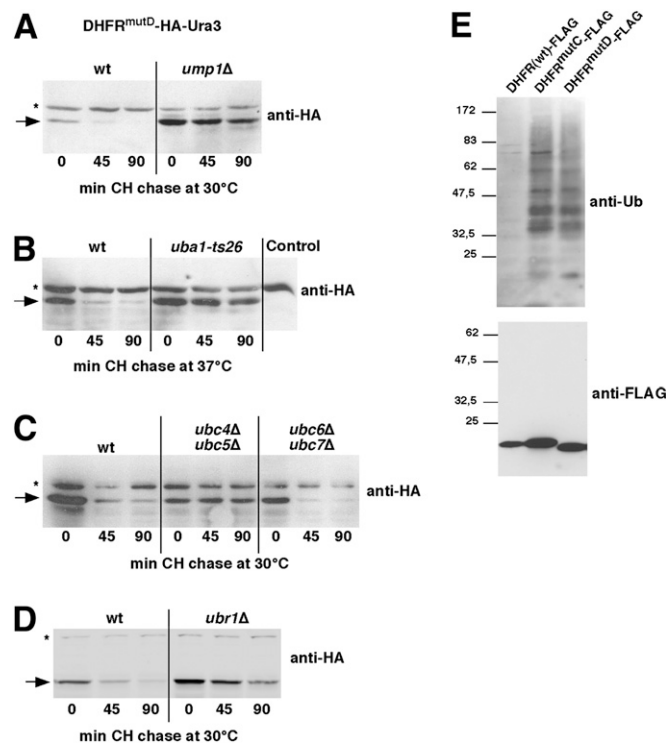

**Fig. S4.** Folding-deficient proteins are degraded by the ubiquitin/proteasome system (UPS). (A) Folding-deficient DHFR is stabilized in the proteasome-deficient *ump1Δ* mutant (1). Cycloheximide chase assay of DHFR<sup>mutD</sup>-Ura3 stability in WT and *ump1Δ* strains. A cross-reactive band is indicated by an asterisk. (B) A functional ubiquitin-activating enzyme is required for the degradation of folding-deficient DHFR. Cycloheximide chase assay of DHFR<sup>mutD</sup>-Ura3 in WT and *uba1-ts26*, a strain expressing a temperature-sensitive ubiquitin-activating enzyme (2). Cells were shifted to the restrictive temperature (37 °C) 20 min before the addition of cycloheximide. A cross-reactive band is indicated by an asterisk. (C) The redundant ubiquitin-conjugating enzymes Ubc4 or Ubc5 are required for degradation of folding-deficient DHFR (3). (D) DHFR<sup>mutD</sup>-Ura3 degradation is attenuated in the *ubr1Δ* mutant lacking the ubiquitin ligase Ubr1 (4). (E) Folding-deficient DHFR is ubiquitylated in vivo. Protein extracts from WT yeast cells expressing FLAG-tagged versions of WT DHFR or its mutant derivatives were subjected to a pull-down experiment using anti-FLAG resin. Bound material was analyzed by anti-ubiquitin and, after stripping, by anti-FLAG Western blotting.

1. Ramos PC, Höckendorff J, Johnson ES, Varshavsky A, Dohmen RJ (1998) Ump1p is required for proper maturation of the 20S proteasome and becomes its substrate upon completion of the assembly. *Cell* 92(4):489–499.
2. Palanimurugan R, Scheel H, Hofmann K, Dohmen RJ (2004) Polyamines regulate their synthesis by inducing expression and blocking degradation of ODC antizyme. *EMBO J* 23(24):4857–4867.
3. Seufert W, Jentsch S (1990) Ubiquitin-conjugating enzymes UBC4 and UBC5 mediate selective degradation of short-lived and abnormal proteins. *EMBO J* 9(2):543–550.
4. Bartel B, Wüning I, Varshavsky A (1990) The recognition component of the N-end rule pathway. *EMBO J* 9(10):3179–3189.

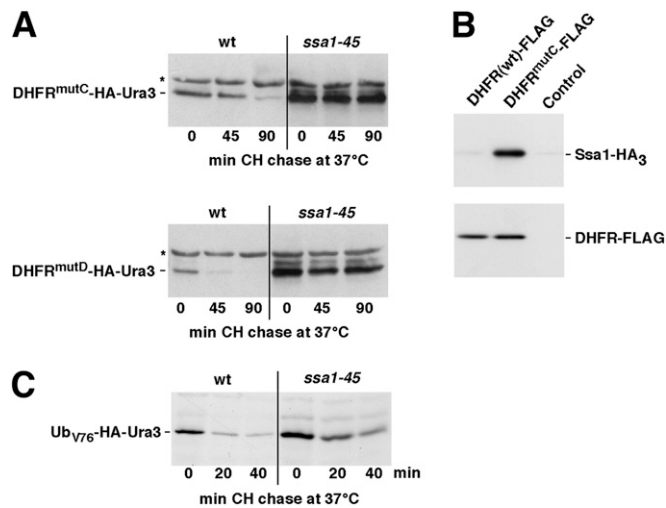

**Fig. S5.** Ssa class Hsp70 chaperones are required specifically for degradation of folding-deficient proteins. (A) Folding-deficient DHFR is stabilized in the *ssa1-45* mutant (1). Cycloheximide (CH) chase assay of DHFR<sup>mutC</sup>-HA-Ura3 and DHFR<sup>mutD</sup>-HA-Ura3 stability in WT and *ssa1-45* cells. Cells were shifted to the restrictive temperature (37 °C) 20 min before the addition of cycloheximide. (B) The Hsp70 chaperone Ssa1 is associated with folding-deficient DHFR. Protein extracts from a yeast strain expressing a 3xHA-tagged Ssa1 and FLAG-tagged versions of WT DHFR or its mutant derivative (mutC) were subjected to a pull-down experiment using anti-FLAG resin. Bound material was analyzed by anti-HA and, after stripping, by anti-FLAG Western blotting. The control strain expressed Ssa1-3xHA but no FLAG-tagged substrate. (C) Ssa class chaperones are not required for the degradation of the ubiquitin-fusion degradation (UFD) pathway substrate Ub<sub>V76</sub>-HA-Ura3. Shown is a cycloheximide chase assay with the same strains as in A but with the UFD substrate. Cross-reactive bands are indicated by asterisks.

1. Kim S, Schilke B, Craig EA, Horwich AL (1998) Folding in vivo of a newly translated yeast cytosolic enzyme is mediated by the SSA class of cytosolic yeast Hsp70 proteins. *Proc Natl Acad Sci USA* 95(22):12860–12865.

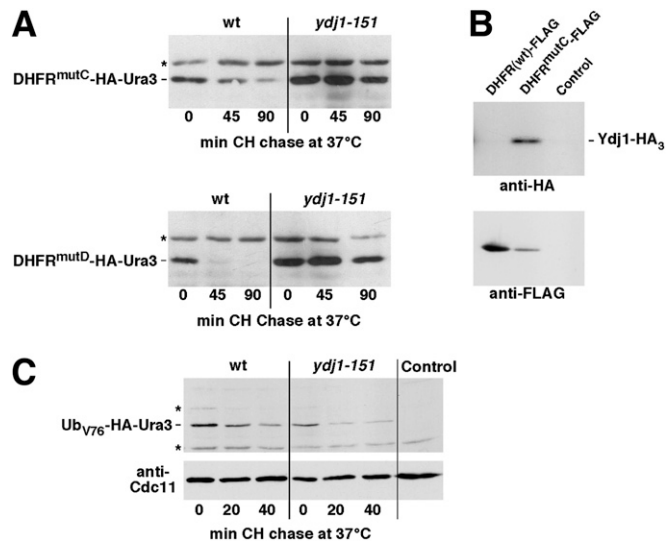

**Fig. S6.** Hsp40 Ydj1 is required specifically for degradation of folding-deficient proteins. (A) Folding-deficient DHFR is stabilized in the *ydj1-151* mutant. Cycloheximide chase assay of DHFR<sup>mutC</sup>-HA-Ura3 and DHFR<sup>mutD</sup>-HA-Ura3 stability in WT and *ydj1-151* cells (1, 2). Cells were shifted to the restrictive temperature (37 °C) 20 min before the addition of cycloheximide. A cross-reactive band is indicated by an asterisk. (B) The Hsp40 cochaperone Ydj1 is associated with folding-deficient DHFR. Protein extracts from a yeast strain expressing a 3xHA tagged Ydj1 and FLAG-tagged versions of WT DHFR or its mutant derivative (mutC) were subjected to a pull-down experiment using anti-FLAG resin. The control strain expressed Ydj1-3xHA but no FLAG-tagged substrate. Bound material was analyzed by anti-HA and, after stripping, by anti-FLAG Western blotting. (C) Cycloheximide chase assay showing degradation of the UFD pathway substrate Ub<sub>V76</sub>-HA-Ura3 in WT and *ydj1-151* cells. Control, extract of WT cells with an empty vector. Cross-reactive bands are indicated by asterisks.

1. Caplan AJ, Cyr DM, Douglas MG (1992) YDJ1p facilitates polypeptide translocation across different intracellular membranes by a conserved mechanism. *Cell* 71(7):1143–1155.  
2. Lee DH, Sherman MY, Goldberg AL (1996) Involvement of the molecular chaperone Ydj1 in the ubiquitin-dependent degradation of short-lived and abnormal proteins in *Saccharomyces cerevisiae*. *Mol Cell Biol* 16(9):4773–4781.

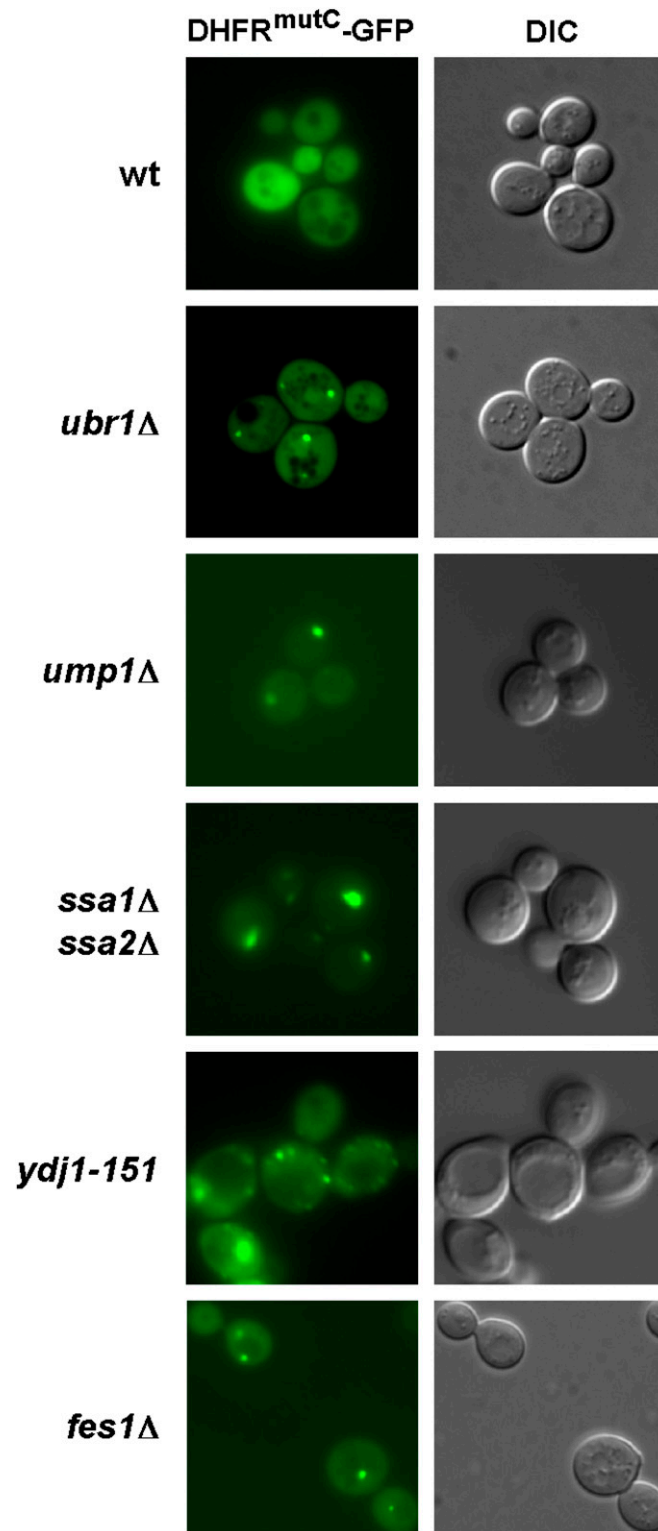

**Fig. S7.** Formation of intracellular aggregates of folding-deficient proteins. Cells with the indicated genotypes expressing DHFR<sup>mutC</sup>-GFP were grown at 30 °C and shifted for 20 min to 37 °C before inspection in the fluorescence microscope (*Left*). (*Right*) Differential interference contrast (DIC) images of the same frames.
